# Supplementary material for: Seropersistence of SII-ChAdOx1 nCoV-19 (COVID-19 vaccine): 6-month follow-up of a randomized, controlled, observer-blind, phase 2/3 immuno-bridging study in Indian adults
Source: PubMed Central journal article supplement — Hum Vaccin Immunother. 2024 Mar 21;20(1):2304974. doi: 10.1080/21645515.2024.2304974 (PMC10962622; doi:10.1080/21645515.2024.2304974), 2024-03-21
Supplement: KHVI_A_2304974_SM7309.pdf [file KHVI_A_2304974_SM7309.pdf]

**Supplementary material of Kulkarni, et al., “Seropersistence of SII-ChAdOx1 nCoV-19 (COVID-19 vaccine): 6-month follow-up of a randomized, controlled, observer-blind, phase 2/3 immuno-bridging study in Indian adults”,  
*Human Vaccines & Immunotherapeutics, 2024***

**Additional statistical methods**

The immunogenicity population, which consisted of all participants in the immunogenicity/reactogenicity cohort who received at least one dose of study vaccine, provided at least one evaluable post-vaccination serum sample and had baseline data available. This was the primary population for immunogenicity analyses. Safety was analysed in the safety population, which consisted of all participants who received at least one dose of study vaccine and had safety data available.

Demographic baseline characteristics were analysed descriptively by vaccine group. Mean, standard deviation, median, and minimum and maximum values were calculated for quantitative variables, and frequencies and percentages were calculated for categorical variables, including distributions of participants according to gender and age groups.

## Supplementary tables

**Table S1.** Baseline characteristics of the study population

|                                     | <b>SII-<br/>ChAdOx1<br/>nCoV-19<br/>(N = 1,200)</b> | <b>AZD1222<br/>(N = 100)</b> | <b>Placebo<br/>(N = 300)</b> | <b>Total<br/>(N = 1,600)</b> |
|-------------------------------------|-----------------------------------------------------|------------------------------|------------------------------|------------------------------|
| <b>Age</b>                          |                                                     |                              |                              |                              |
| Mean, years (SD)                    | 42.1 (13.24)                                        | 46.8 (16.29)                 | 40.2 (13.26)                 | 42.0 (13.52)                 |
| <b>Age group, years</b>             |                                                     |                              |                              |                              |
| 18–59                               | 1,048 (87.3)                                        | 74 (74.0)                    | 271 (90.3)                   | 1,393 (87.1)                 |
| ≥60                                 | 152 (12.7)                                          | 26 (26.0)                    | 29 (9.7)                     | 207 (12.9)                   |
| <b>Sex</b>                          |                                                     |                              |                              |                              |
| Male                                | 925 (77.1)                                          | 80 (80.0)                    | 218 (72.7)                   | 1,223 (76.4)                 |
| Female                              | 275 (22.9)                                          | 20 (20.0)                    | 82 (27.3)                    | 377 (23.6)                   |
| <b>Body mass index</b>              |                                                     |                              |                              |                              |
| <i>n</i>                            | 1,200                                               | 100                          | 300                          | 1,600                        |
| Mean, kg/m <sup>2</sup> (SD)        | 25.36<br>(4.154)                                    | 25.05<br>(4.433)             | 25.29<br>(4.185)             | 25.33<br>(4.176)             |
| <b>Child-bearing<br/>potential*</b> |                                                     |                              |                              |                              |
| Yes                                 | 147 (53.5)                                          | 9 (45.0)                     | 42 (51.2)                    | 198 (52.5)                   |

|                                    |              |           |            |              |
|------------------------------------|--------------|-----------|------------|--------------|
| No                                 | 128 (46.5)   | 11 (55.0) | 40 (48.8)  | 179 (47.5)   |
| <b>SARS-CoV-2 serology results</b> |              |           |            |              |
| Seropositive                       | 26 (2.2)     | 2 (2.0)   | 4 (1.3)    | 32 (2.0)     |
| Seronegative                       | 1,174 (97.8) | 98 (98.0) | 296 (98.7) | 1,568 (98.0) |
| <b>RT-PCR results</b>              |              |           |            |              |
| Negative                           | 1,200 (100)  | 100 (100) | 300 (100)  | 1,600 (100)  |
| <b>Co-morbidities</b>              | 284 (23.7)   | 26 (26.0) | 68 (22.7)  | 378 (23.6)   |

Data are *n* (%) unless stated otherwise. \*Female participants only and percentages are based on the total number of female participants. RT-PCR, reverse transcription polymerase chain reaction; SARS-CoV-2, severe acute respiratory syndrome coronavirus 2; SD, standard deviation.

**Table S2.** Summary of anti-S and anti-RBD IgG and nAbs in the baseline seronegative population (immunogenicity analysis population)

| Timepoint        | Statistic | Anti-S                              |                         | Anti-RBD                            |                         | nAbs                                    |                     |
|------------------|-----------|-------------------------------------|-------------------------|-------------------------------------|-------------------------|-----------------------------------------|---------------------|
|                  |           | SII-ChAdOx1<br>nCoV-19<br>(N = 288) | AZD1222<br>(N = 96)     | SII-ChAdOx1<br>nCoV-19<br>(N = 297) | AZD1222<br>(N = 98)     | SII-<br>ChAdOx1<br>nCoV-19<br>(N = 288) | AZD1222<br>(N = 96) |
| <b>Visit 4 –</b> | <i>n</i>  | 284                                 | 94                      | 284                                 | 94                      | 282                                     | 94                  |
| <b>Day 57</b>    | GMT       | 29,192.1                            | 27,573.7                | 37,253.1                            | 35,423.0                | 66.1                                    | 54.2                |
| <b>(+14)</b>     | (95% CI)  | (25,875.4–<br>32,933.9)             | (22,916.6–<br>33,177.2) | (32,757.5–<br>42,365.7)             | (29,287.1–<br>42,844.5) | (57.8–75.7)                             | (43.1–68.2)         |
|                  | GMFR      | 354.1                               | 394.7                   | 242.6                               | 249.4                   | 13.3                                    | 12.2                |
|                  | (95% CI)  | (293.1–427.8)                       | (295.6–527.1)           | (206.0–285.7)                       | (191.8–324.3)           | (11.5–15.4)                             | (9.5–15.8)          |

| Timepoint        | Statistic | Anti-S                              |                        | Anti-RBD                            |                         | nAbs                                    |                     |
|------------------|-----------|-------------------------------------|------------------------|-------------------------------------|-------------------------|-----------------------------------------|---------------------|
|                  |           | SII-ChAdOx1<br>nCoV-19<br>(N = 288) | AZD1222<br>(N = 96)    | SII-ChAdOx1<br>nCoV-19<br>(N = 297) | AZD1222<br>(N = 98)     | SII-<br>ChAdOx1<br>nCoV-19<br>(N = 288) | AZD1222<br>(N = 96) |
| <b>Visit 6 –</b> | <i>n</i>  | 249                                 | 86                     | 249                                 | 86                      | 80                                      | 29                  |
| <b>Day 180</b>   | GMT       | 9,769.8                             | 14,942.8               | 11,234.9                            | 18,472.2                | 25.2                                    | 27.4                |
| <b>(+28)</b>     | (95% CI)  | (8,177.3–<br>11,672.4)              | (9,869.9–<br>22,623.1) | (9,234.1–<br>13,669.2)              | (12,102.8–<br>28,193.6) | (17.6–36.0)                             | (12.4–60.3)         |
|                  | GMFR      | 117.9                               | 197.8                  | 72.4                                | 126.1                   | 5.0                                     | 6.4                 |
|                  | (95% CI)  | (92.7–150.0)                        | (120.7–323.9)          | (57.8–90.6)                         | (78.6–202.2)            | (3.4–7.3)                               | (2.8–14.9)          |

Anti-RBD, anti-receptor binding domain; anti-S, anti-spike; CI, confidence interval; GMFR, geometric mean fold rise; GMT, geometric mean titer; IgG, immunoglobulin; nAb, neutralizing antibody.

**Table S3.** Proportion of participants with seroconversion for anti-S and anti-RBD IgG and nAbs in the baseline seronegative population (immunogenicity analysis population)

| Timepoint        | Statistic                    | Anti-S                              |                     | Anti-RBD                            |                     | nAbs                                |                     |
|------------------|------------------------------|-------------------------------------|---------------------|-------------------------------------|---------------------|-------------------------------------|---------------------|
|                  |                              | SII-ChAdOx1<br>nCoV-19<br>(N = 288) | AZD1222<br>(N = 96) | SII-ChAdOx1<br>nCoV-19<br>(N = 288) | AZD1222<br>(N = 96) | SII-ChAdOx1<br>nCoV-19<br>(N = 288) | AZD1222<br>(N = 96) |
| <b>Visit 4 –</b> | <i>N</i> evaluated           | 284                                 | 94                  | 284                                 | 94                  | 282                                 | 94                  |
| <b>Day 57</b>    | Seroconversion, <i>n</i> (%) | 280 (98.6)                          | 94 (100.0)          | 277 (97.5)                          | 93 (98.9)           | 241 (85.5)                          | 79 (84.0)           |
| <b>(+14)</b>     | 95% CI                       | 96.4–99.6                           | 96.2–100.0          | 95.0–99.0                           | 94.2–100.0          | 80.8–89.4                           | 75.0–90.8           |
| <b>Visit 6 –</b> | <i>N</i> evaluated           | 249                                 | 86                  | 249                                 | 86                  | 80                                  | 29                  |
| <b>Day 180</b>   | Seroconversion, <i>n</i> (%) | 239 (96.0)                          | 85 (98.8)           | 232 (93.2)                          | 82 (95.3)           | 46 (57.5)                           | 15 (51.7)           |
| <b>(+28)</b>     | 95% CI                       | 92.7–98.1                           | 93.7–100.0          | 89.3–96.0                           | 88.5–98.7           | 45.9–68.5                           | 32.5–70.6           |

Anti-RBD, anti-receptor binding domain; anti-S, anti-spike; CI, confidence interval; IgG, immunoglobulin; nAb, neutralizing antibody.

**Table S4.** Incidence of COVID-19 (symptomatic, asymptomatic, and symptomatic + asymptomatic) after first dose of study vaccine (Day 1) through Day 180

| <b>Parameter</b>                           | <b>ChAdOx1 nCoV-19</b><br>( <i>N</i> = 1,200) | <b>Placebo</b><br>( <i>N</i> = 300) | <b>AZD1222</b><br>( <i>N</i> = 100) |
|--------------------------------------------|-----------------------------------------------|-------------------------------------|-------------------------------------|
| <b>Symptomatic COVID-19</b>                | 43 (3.6)<br>(2.6–4.8)                         | 19 (6.3)<br>(3.9–9.7)               | 5 (5.0)<br>(1.6–11.3)               |
| <b>Asymptomatic COVID-19</b>               | 45 (3.8)<br>(2.7–5.0)                         | 9 (3)<br>(1.4–5.6)                  | 3 (3.0)<br>(0.6–8.5)                |
| <b>Symptomatic + asymptomatic COVID-19</b> | 88 (7.3)<br>(5.9–9.0)                         | 28 (9.3)<br>(6.3–13.2)              | 8 (8.0)<br>(3.5–15.2)               |
| <b>Hospitalization for COVID-19</b>        | 13 (1.1)<br>(0.6–1.8)                         | 3 (1.0)<br>(0.2–2.9)                | 1 (1.0)<br>(0–5.4)                  |
| <b>Severe COVID-19</b>                     | 0                                             | 1 (0.3)<br>(0–1.8)                  | 0                                   |
| <b>Deaths</b>                              | 0                                             | 0                                   | 0                                   |

Data are *n* (%) and 95% CI. CI, confidence interval; COVID-19, coronavirus disease 2019.
